# Supplementary material
Source: publisher figshare collection journal article supplement (https://tandf.figshare.com/articles/dataset/_/24289179)
Supplement: Supplementary file 2 [file 1]

## **Informed consent form**

### **Research project euthanasia of animals and the role of the veterinarian**

1. I have had sufficient information about the background of the research project and the goal of the interview.
2. Questions regarding the research project and my participation in the related interview were sufficiently answered.
3. I understand and agree with the fact that an anonymized written report concerning the interview can be used in scientific publications, presentations, and workshops.
4. I understand and agree with the recording of the interview.
5. I understand that I can withdraw from participating in the research project at any moment and based on any reason.
6. I have read the informed consent completely, I understand and agree with my participation in the research project and the related interview based on the above statements and agree with the use of the information I share during the interview.

Name: \_\_\_\_\_

Signature: \_\_\_\_\_

Date: \_\_\_\_\_

For questions concerning the research project or the interview, please contact the head researcher Ellen Deelen via:

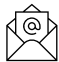

[e.deelen@uu.nl](mailto:e.deelen@uu.nl)

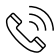

0620068434

For questions or remarks regarding privacy within this research project, you can contact the privacy department of Utrecht University via [privacy@uu.nl](mailto:privacy@uu.nl)

For complaints regarding this research project, you can contact Hans Heesterbeek via [j.a.p.heesterbeek@uu.nl](mailto:j.a.p.heesterbeek@uu.nl)

*This research project is funded by the Faculty of Veterinary Medicine of Utrecht University. The research theme is part of the research group Centre for Sustainable Animal Stewardship (CenSAS), Division of Animals in Science and Society. CenSAS researches themes concerning the relationship between animals and humans. This research project is supervised by an interdisciplinary team including Franck Meijboom, Tijs Tobias, Ferry Koster, Jan Willem Hesselink, and Bas Rodenburg.*
