# Supplementary material
Source: publisher figshare collection journal article supplement (https://tandf.figshare.com/articles/dataset/_/24289179)
Supplement: Supplementary file 4 [file 1]

## **Codebook**

1. Reference frame
2. Additional confirmatory diagnostics
3. Time to reflect
4. Rehoming
5. Peer consultation
6. The owner's financial position
  - a. Financial support
7. The owner's motivation
